# Supplementary material for: Remission of Spontaneous Canine Tumors after Systemic Cellular Viroimmunotherapy
Source: Oxford University Press journal article supplement (doi:10.1158/0008-5472.can-17-3754), 2018-07-10
Supplement: 00085472can173754-sup-193467_3_supp_4845145_p7p773.docx [file 00085472can173754-sup-193467_3_supp_4845145_p7p773.docx]

| **Supplementary Table 2. Quality of Life Test** | | | |
| --- | --- | --- | --- |
|  |  |  |  |
|  | Patients | QoL assessment | |
|  | UAX-01 | 70 | Good |
|  | UAX-02 | 70 | Good |
|  | UAX-03 | 30 | Bad |
|  | UAX-04 | 50 | Good |
|  | UAX-05 | 20 | Bad |
|  | UAX-06 | 70 | Good |
|  | UAX-07 | 55 | Good |
|  | UAX-08 | 20 | Good |
|  | UAX-09 | 20 | Bad |
|  | UAX-10 | 70 | Good |
|  | UAX-11 | 15 | Bad |
|  | UAX-12 | 60 | Good |
|  | UAX-13 | 45 | Good |
|  | UAX-14 | 30 | Bad |
|  | UAX-15 | 10 | Bad |
|  | UAX-16 | 65 | Good |
|  | UAX-17 | 55 | Good |
|  | UAX-18 | 45 | Good |
|  | UAX-19 | 70 | Good |
|  | UAX-20 | 65 | Good |
|  | UAX-21 | 60 | Bad |
|  | UAX-22 | 65 | Good |
|  | UAX-23 | 60 | Good |
|  | UAX-24 | 70 | Good |
|  | UAX-25 | 65 | Good |
|  | UAX-26 | 50 | Good |
|  |  |  |  |
| Qol assesment threshold | | N | % |
|  | Good (>35) | 19 | 73 |
|  | Bad (<35) | 7 | 27 |
|  |  |  |  |
