# Supplementary material for: Remission of Spontaneous Canine Tumors after Systemic Cellular Viroimmunotherapy
Source: Oxford University Press journal article supplement (doi:10.1158/0008-5472.can-17-3754), 2018-07-10
Supplement: 00085472can173754-sup-193467_3_supp_4859316_pb1kzm.docx [file 00085472can173754-sup-193467_3_supp_4859316_pb1kzm.docx]

| **Antigen** | **Sp. reactiv.** | **Clone** | **Commercial** |
| --- | --- | --- | --- |
| CD90 | Dog | YKIX337.217 | AbDserotec |
| CD29 | Dog | MEM-101A | eBioscience |
| CD73 | Dog | 7G2 | eBioscience |
| MHCII | Dog | YKIX334.2 | AbDserotec |
| CD3 | Dog | CA17.2A12 | AbDserotec |
| CD11 | Dog | XYKIX490.6.4 | AbDserotec |
| CD45 | Dog | YKIX716.13 | AbDserotec |
| CD4 | Dog | YKIX302.9 | AbDserotec |
| CD8 | Dog | YCATE55.9 | AbDserotec |
| CD25 | Dog | P4A10 | AbDserotec |
| CD21 | Dog | CA2.1D6 | Biorad |
| CD5 | Dog | YKIX322.3 | eBioscience |
| CD44 | Human/mouse | IM7 | eBioscience |
| CD14 | Human | 61D3 | BD Pharm |
| CD3 | Dog | polyclonal | Dako |
| CD8 | Dog | polyclonal | abcam |
| CD4 | Dog | 10B5 | abcam |
| CD68 | Dog | MAC387 | abcam |
| Ad5 | Human | ab6982 | abcam |
| HABP | - | AMS.HKD-BC41 | AmsBio |
| β-actin | Human | AC-15 | Sigma |
|  |  |  |  |

**Supplementary Table 1. List of used antibodies.**
